# Supplementary material for: Tree visualizations of protein sequence embedding space enable improved functional clustering of diverse protein superfamilies
Source: PubMed Central journal article supplement — Brief Bioinform. 2023 Jan 15;24(1):bbac619. doi: 10.1093/bib/bbac619 (PMC9851311; doi:10.1093/bib/bbac619), 2023-01-15
Supplement: supp_data_bbac619.pdf [file supp_data_bbac619.pdf]

## SUPPLEMENTAL DATA

**Supplemental Figure S1.** We benchmark the performance of various manifold visualization methods using 6048 protein domain sequence datasets from Pfam. This is an expansion of the benchmarks shown in Figure 3A. The dotted lines in gray are a visual guide indicating  $x=0.8$  and  $x=0.9$ . As an aside, we note the apparent performance of MDS in Spearman rank correlation. Although MDS has the ability to capture global structure, we demonstrate that the method is not good at identifying distinct clusters, quantified by silhouette score in Supplemental Figure S2.

**Supplemental Figure S2.** Manifold scatter plot visualizations for the phosphatases, protein kinases, and radical SAM datasets using various dimensionality reduction methods. This is an expansion of the scatter plots shown in Figure 4A, 6A, and 8A. Color labels are maintained, corresponding to their respective figures in the main text.

**Supplemental Figure S3.** Embedding-based tree of human phosphatases. VIBEs are shown on each hierarchical cluster. This is the full data for the tree shown in Figure 4B.

**Supplemental Figure S4.** Embedding-based tree of human phosphatases. VIBEs are shown on each hierarchical cluster. This is the full data for the tree shown in Figure 5.

**Supplemental Figure S5.** Embedding-based tree of human protein kinases. VIBEs are shown on each hierarchical cluster. This is the full data for the tree shown in Figure 6B.

**Supplemental Figure S6.** Embedding-based tree of human protein kinases. VIBEs are shown on each hierarchical cluster. This is the full data for the tree shown in Figure 7.

**Supplemental Figure S7.** Embedding-based tree of the radical SAM enzymes. VIBEs are shown on each hierarchical cluster. This is the full data for the tree shown in Figure 8A and 8B.

| representation        | distance metric | silhouette score |
|-----------------------|-----------------|------------------|
| mean_special_tokens   | TS_SS           | 0.2873           |
| beginning_of_sequence | TS_SS           | 0.2851           |
| beginning_of_sequence | cosine          | 0.2751           |
| mean_special_tokens   | cosine          | 0.2607           |
| mean_residue_tokens   | TS_SS           | 0.2375           |
| mean_residue_tokens   | cosine          | 0.2372           |
| beginning_of_sequence | manhattan       | 0.2062           |
| beginning_of_sequence | euclidean       | 0.1932           |
| end_of_sequence       | cosine          | 0.1886           |
| mean_special_tokens   | manhattan       | 0.1874           |
| mean_special_tokens   | euclidean       | 0.1865           |
| end_of_sequence       | TS_SS           | 0.1856           |
| mean_residue_tokens   | manhattan       | 0.1804           |
| mean_residue_tokens   | jensenshannon   | 0.1706           |
| mean_residue_tokens   | euclidean       | 0.1703           |
| end_of_sequence       | manhattan       | 0.1588           |
| end_of_sequence       | euclidean       | 0.1554           |
| end_of_sequence       | jensenshannon   | 0.1495           |
| mean_special_tokens   | jensenshannon   | 0.0557           |
| beginning_of_sequence | jensenshannon   | -0.3880          |

**Supplemental Table S1.** Evaluating methods for calculating embedding distances within the human phosphatase dataset. Starting from full-sized embeddings of the phosphatase sequences, we evaluate different strategies for producing a fixed-size embedding (the representation column) and distance metrics. The resulting distance matrices from each combination were evaluated using the silhouette score, given the phosphatase structural fold labels: CC1, CC2, CC3, HAD, HP, AP, PPL, and PPM. The RTR1 and PHP fold labels were not considered for calculating silhouette score as they only contain one example each.

| representation        | distance metric | silhouette score |
|-----------------------|-----------------|------------------|
| end_of_sequence       | TS_SS           | 0.3793           |
| mean_special_tokens   | TS_SS           | 0.3621           |
| end_of_sequence       | cosine          | 0.3210           |
| mean_special_tokens   | cosine          | 0.2978           |
| beginning_of_sequence | TS_SS           | 0.2225           |
| beginning_of_sequence | cosine          | 0.2128           |
| end_of_sequence       | jensenshannon   | 0.2031           |
| end_of_sequence       | euclidean       | 0.2029           |
| end_of_sequence       | manhattan       | 0.2013           |
| mean_special_tokens   | euclidean       | 0.1873           |
| mean_special_tokens   | manhattan       | 0.1872           |
| mean_residue_tokens   | cosine          | 0.1840           |
| mean_residue_tokens   | TS_SS           | 0.1650           |
| beginning_of_sequence | manhattan       | 0.1433           |
| beginning_of_sequence | euclidean       | 0.1389           |
| mean_residue_tokens   | manhattan       | 0.1303           |
| mean_residue_tokens   | jensenshannon   | 0.1292           |
| mean_residue_tokens   | euclidean       | 0.1283           |
| mean_special_tokens   | jensenshannon   | 0.1148           |
| beginning_of_sequence | jensenshannon   | -0.2399          |

**Supplemental Table S2.** Evaluating methods for calculating embedding distances within the human protein kinase dataset. Starting from full-sized embeddings of the protein kinase sequences, we evaluate different strategies for producing a fixed-size embedding (the representation column) and distance metrics. The resulting distance matrices from each combination were evaluated using the silhouette score, given the kinase evolutionary group labels: TK, TKL, RGC, NEK, STE, AGC, CAMK, CMGC, CK1, and Atypical which contains divergent lipid and small molecule kinases. The Others group was not considered for calculating silhouette score as it reflects evolutionary intermediates which could not be classified into any of the major evolutionary groups.

| representation        | distance metric | silhouette score |
|-----------------------|-----------------|------------------|
| mean_special_tokens   | TS_SS           | 0.5419           |
| end_of_sequence       | TS_SS           | 0.5317           |
| beginning_of_sequence | TS_SS           | 0.5168           |
| mean_special_tokens   | cosine          | 0.4814           |
| end_of_sequence       | cosine          | 0.4744           |
| beginning_of_sequence | cosine          | 0.4724           |
| mean_residue_tokens   | TS_SS           | 0.4186           |
| mean_residue_tokens   | cosine          | 0.3837           |
| end_of_sequence       | euclidean       | 0.3376           |
| end_of_sequence       | jensenshannon   | 0.3374           |
| end_of_sequence       | manhattan       | 0.3369           |
| mean_special_tokens   | euclidean       | 0.3338           |
| mean_special_tokens   | manhattan       | 0.3334           |
| beginning_of_sequence | euclidean       | 0.3248           |
| beginning_of_sequence | manhattan       | 0.3246           |
| mean_special_tokens   | jensenshannon   | 0.2918           |
| mean_residue_tokens   | manhattan       | 0.2738           |
| mean_residue_tokens   | euclidean       | 0.2686           |
| mean_residue_tokens   | jensenshannon   | 0.2643           |
| beginning_of_sequence | jensenshannon   | -0.1061          |

**Supplemental Table S3.** Evaluating methods for calculating embedding distances within the radical SAM dataset. Starting from full-sized embeddings of the radical SAM sequences, we evaluate different strategies for producing a fixed-size embedding (the representation column) and distance metrics. The resulting distance matrices from each combination were evaluated using the silhouette score, given the radical SAM family labels: LipA, MTTase, MTaseA, B12-binding, HemN, Eip3, BATS, Viperin, SPASM, Activating Enzyme, QueE, TYW1, and PHP-dependent.
