# Supplementary figures and images for: Tree visualizations of protein sequence embedding space enable improved functional clustering of diverse protein superfamilies
Source: PubMed Central journal article supplement — Brief Bioinform. 2023 Jan 15;24(1):bbac619. doi: 10.1093/bib/bbac619 (PMC9851311; doi:10.1093/bib/bbac619), 2023-01-15

Supplemental Figure S1

Spearman

Trustworthiness (k=10)

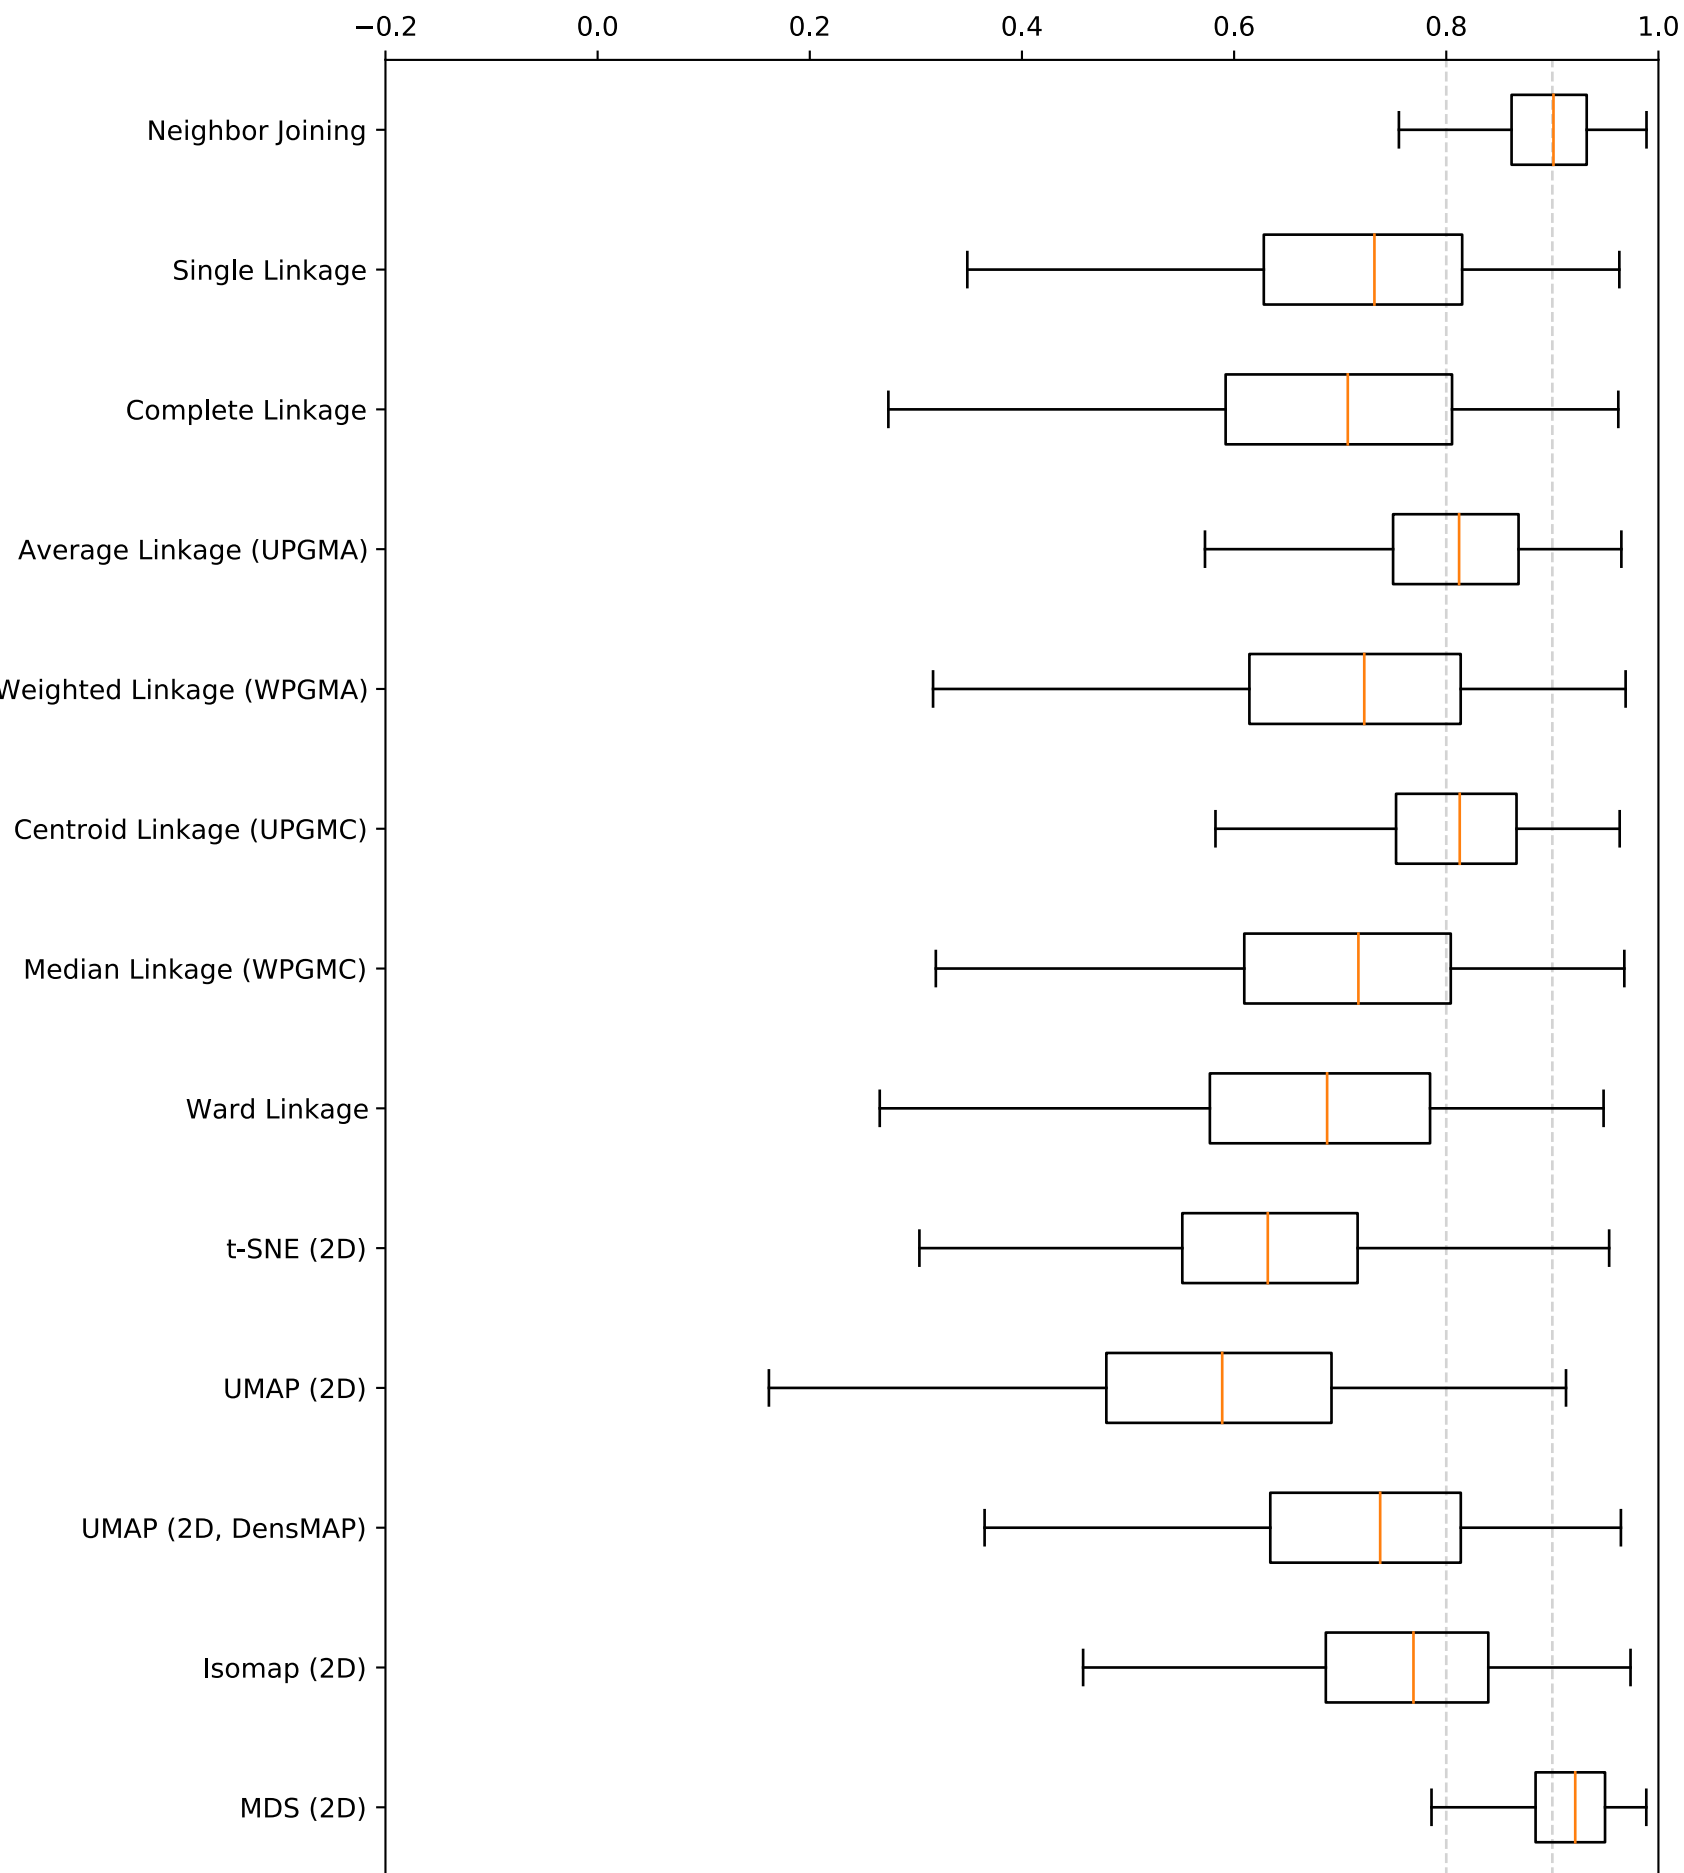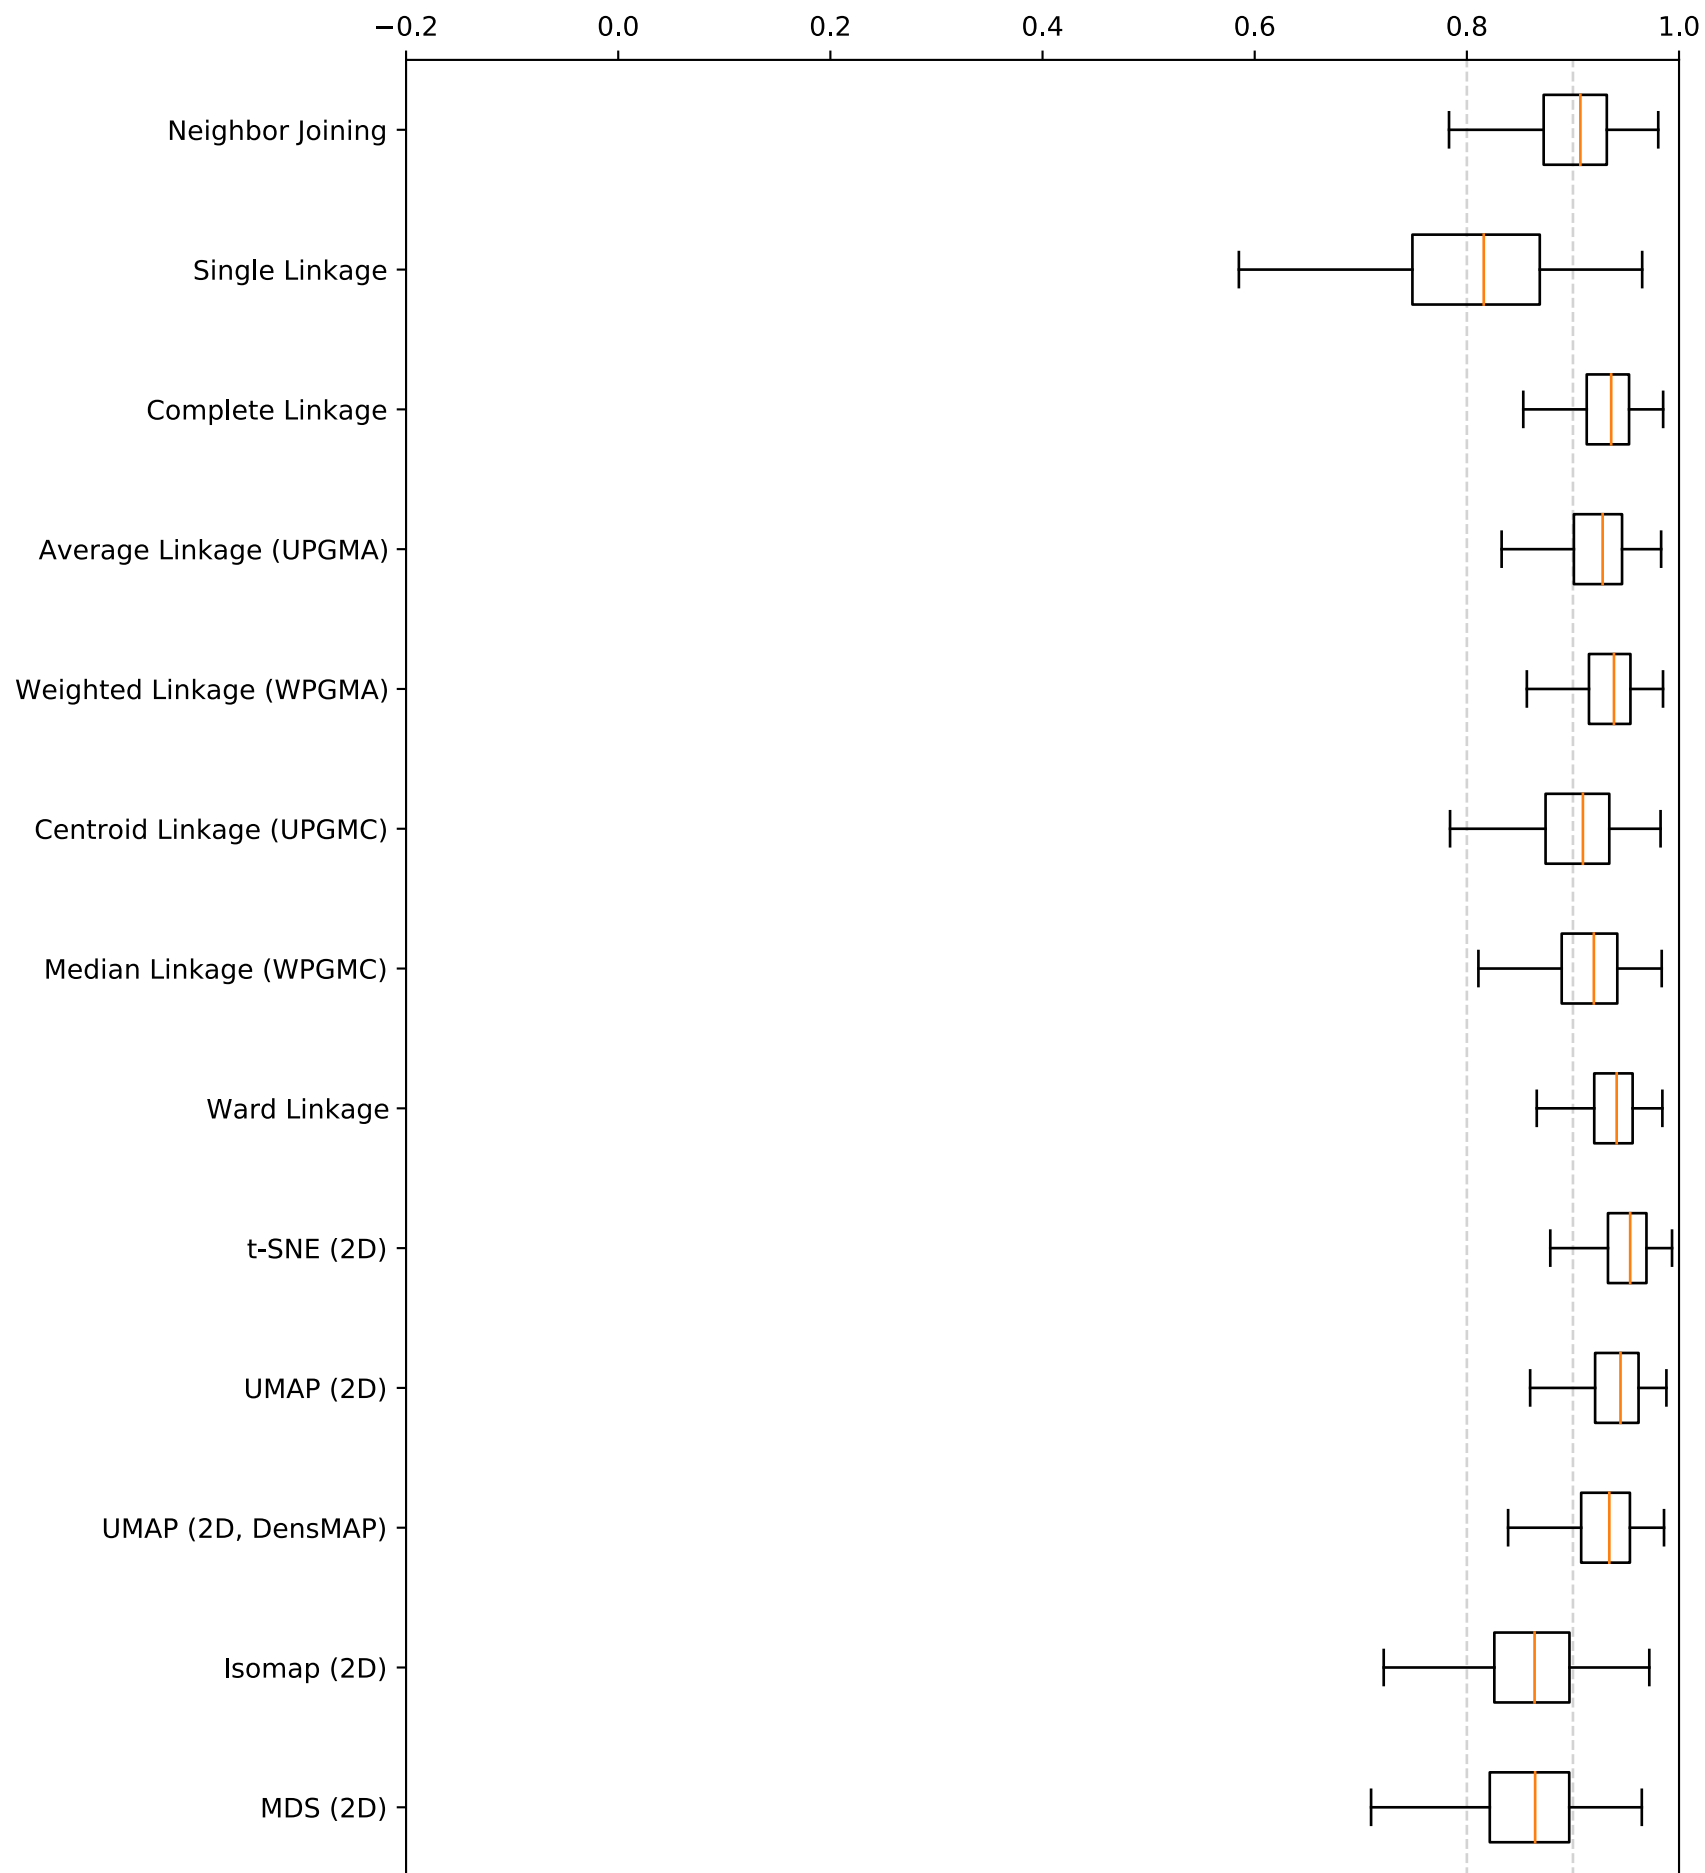

Supplement: supp_fig_s1_bbac619.pdf [file supp_fig_s1_bbac619.pdf]

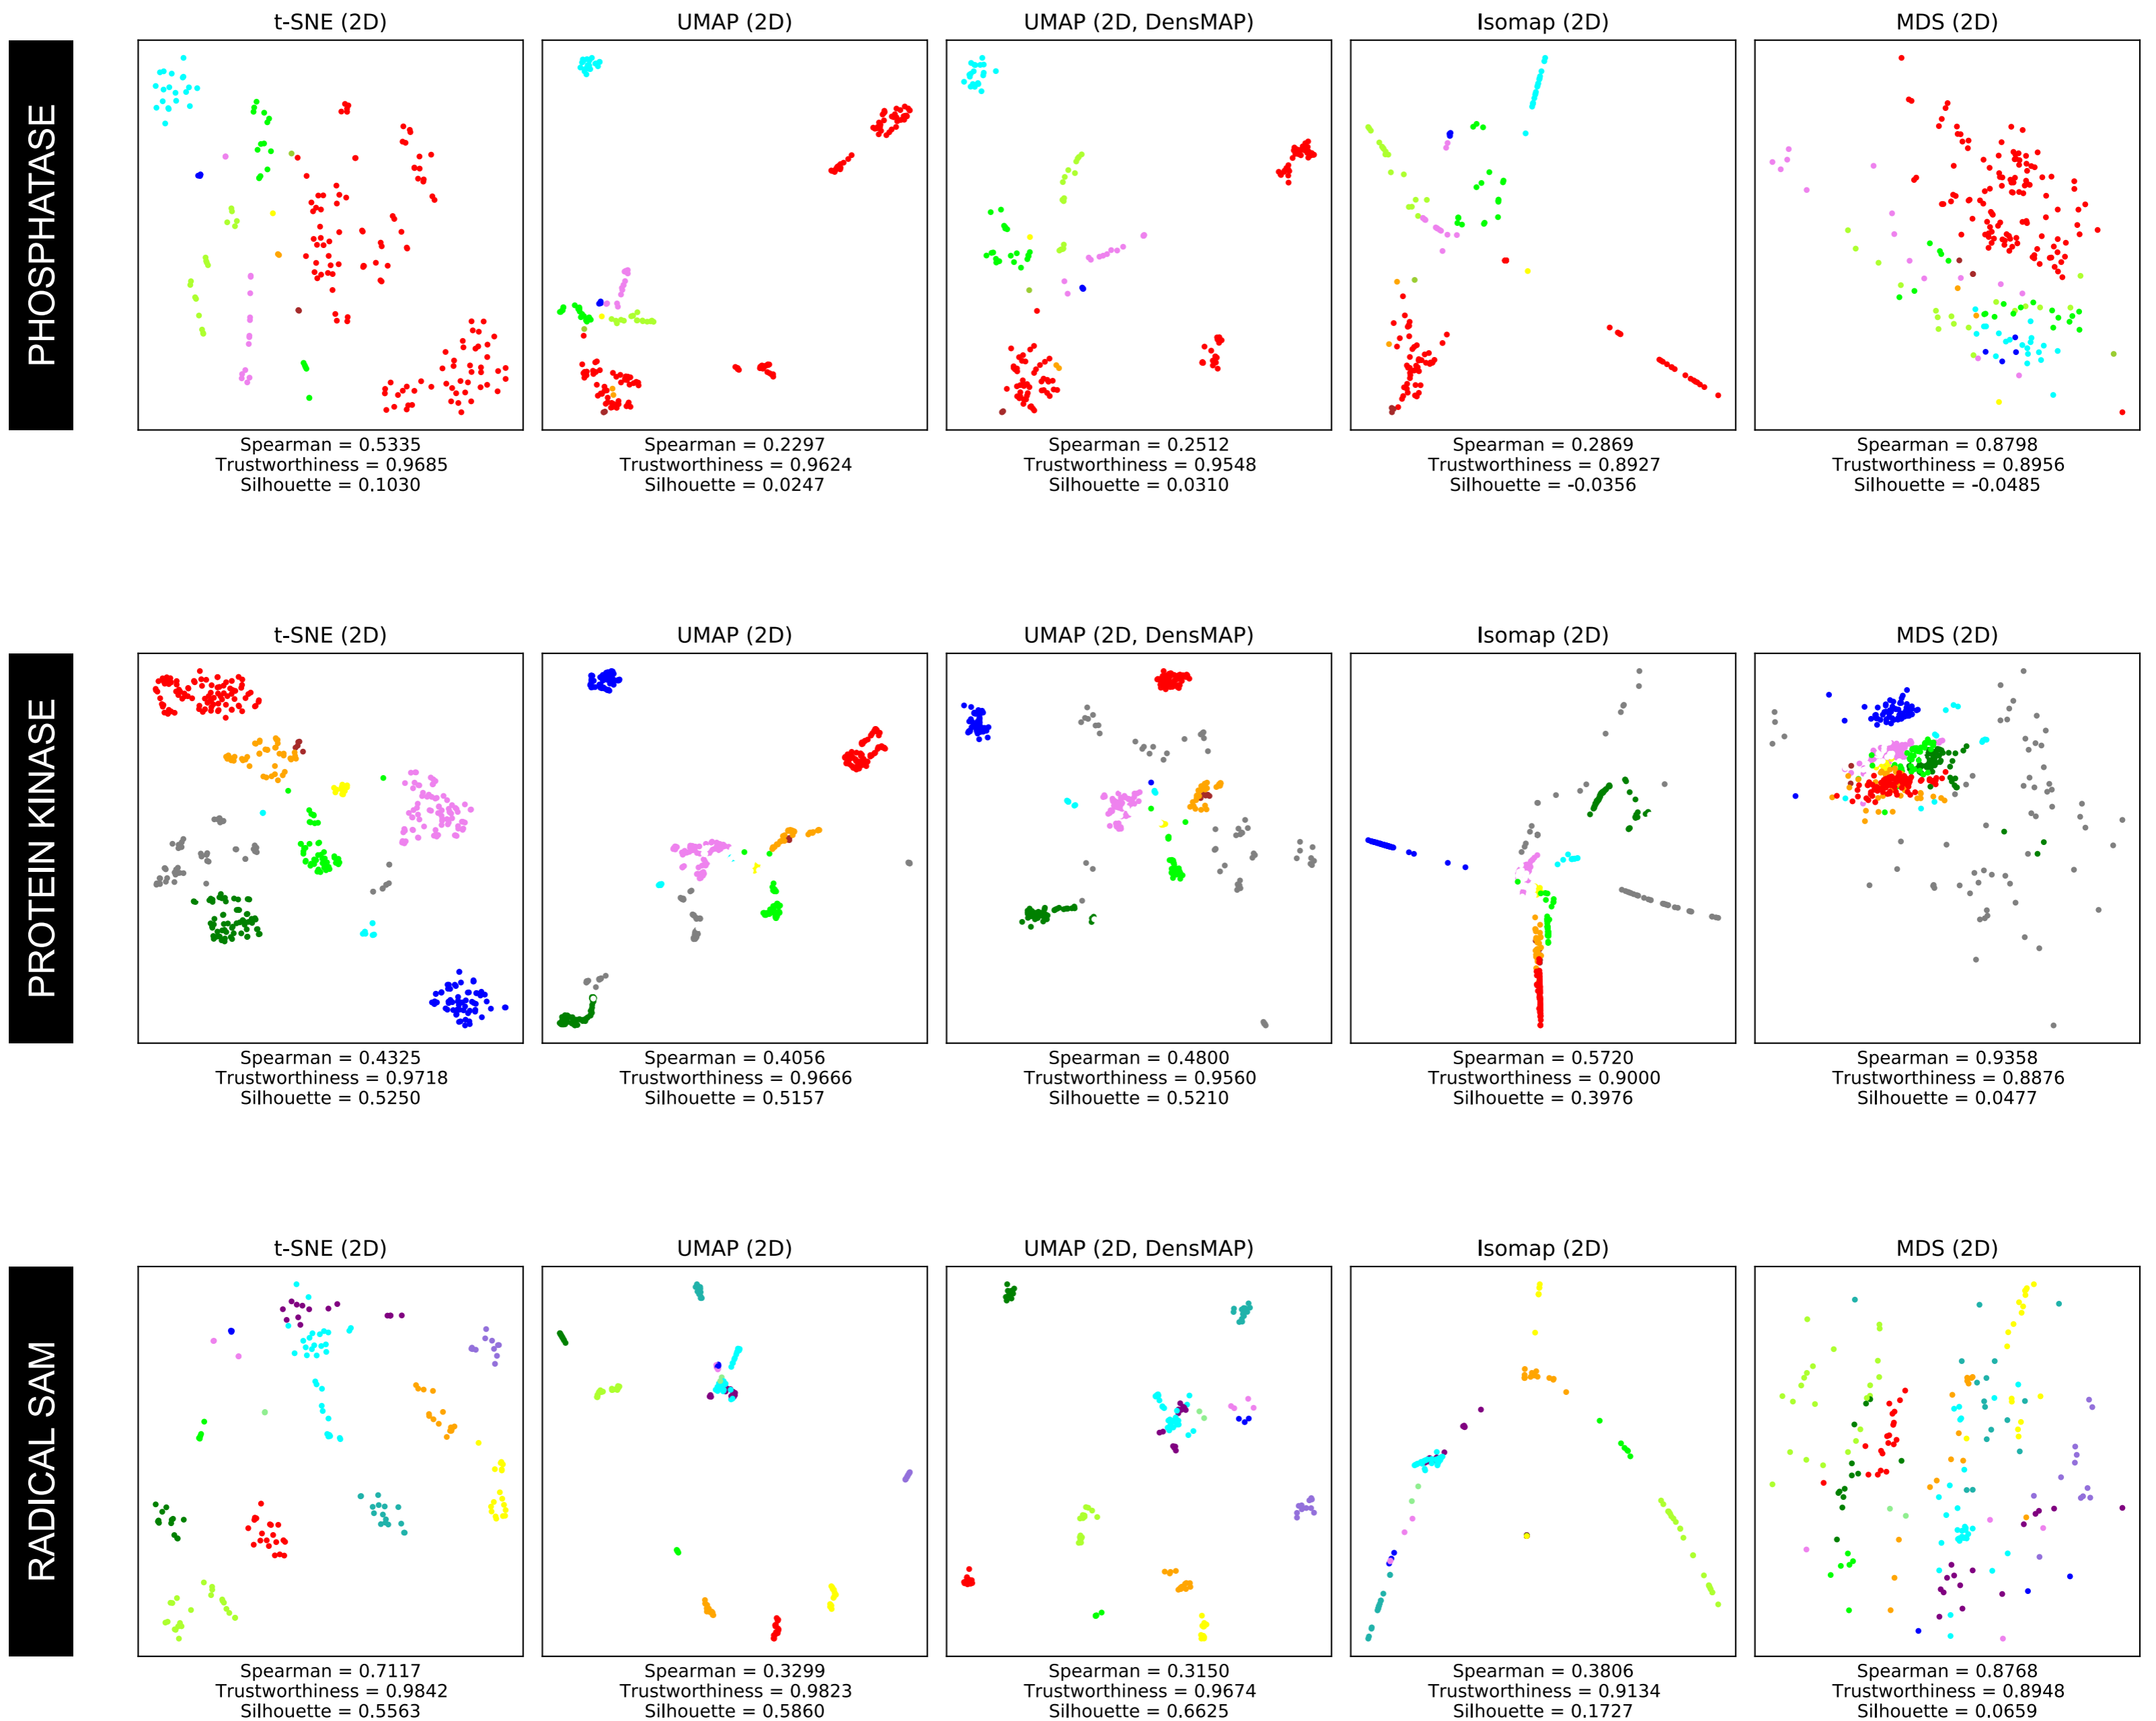

Supplement: supp_fig_s2_bbac619.pdf [file supp_fig_s2_bbac619.pdf]

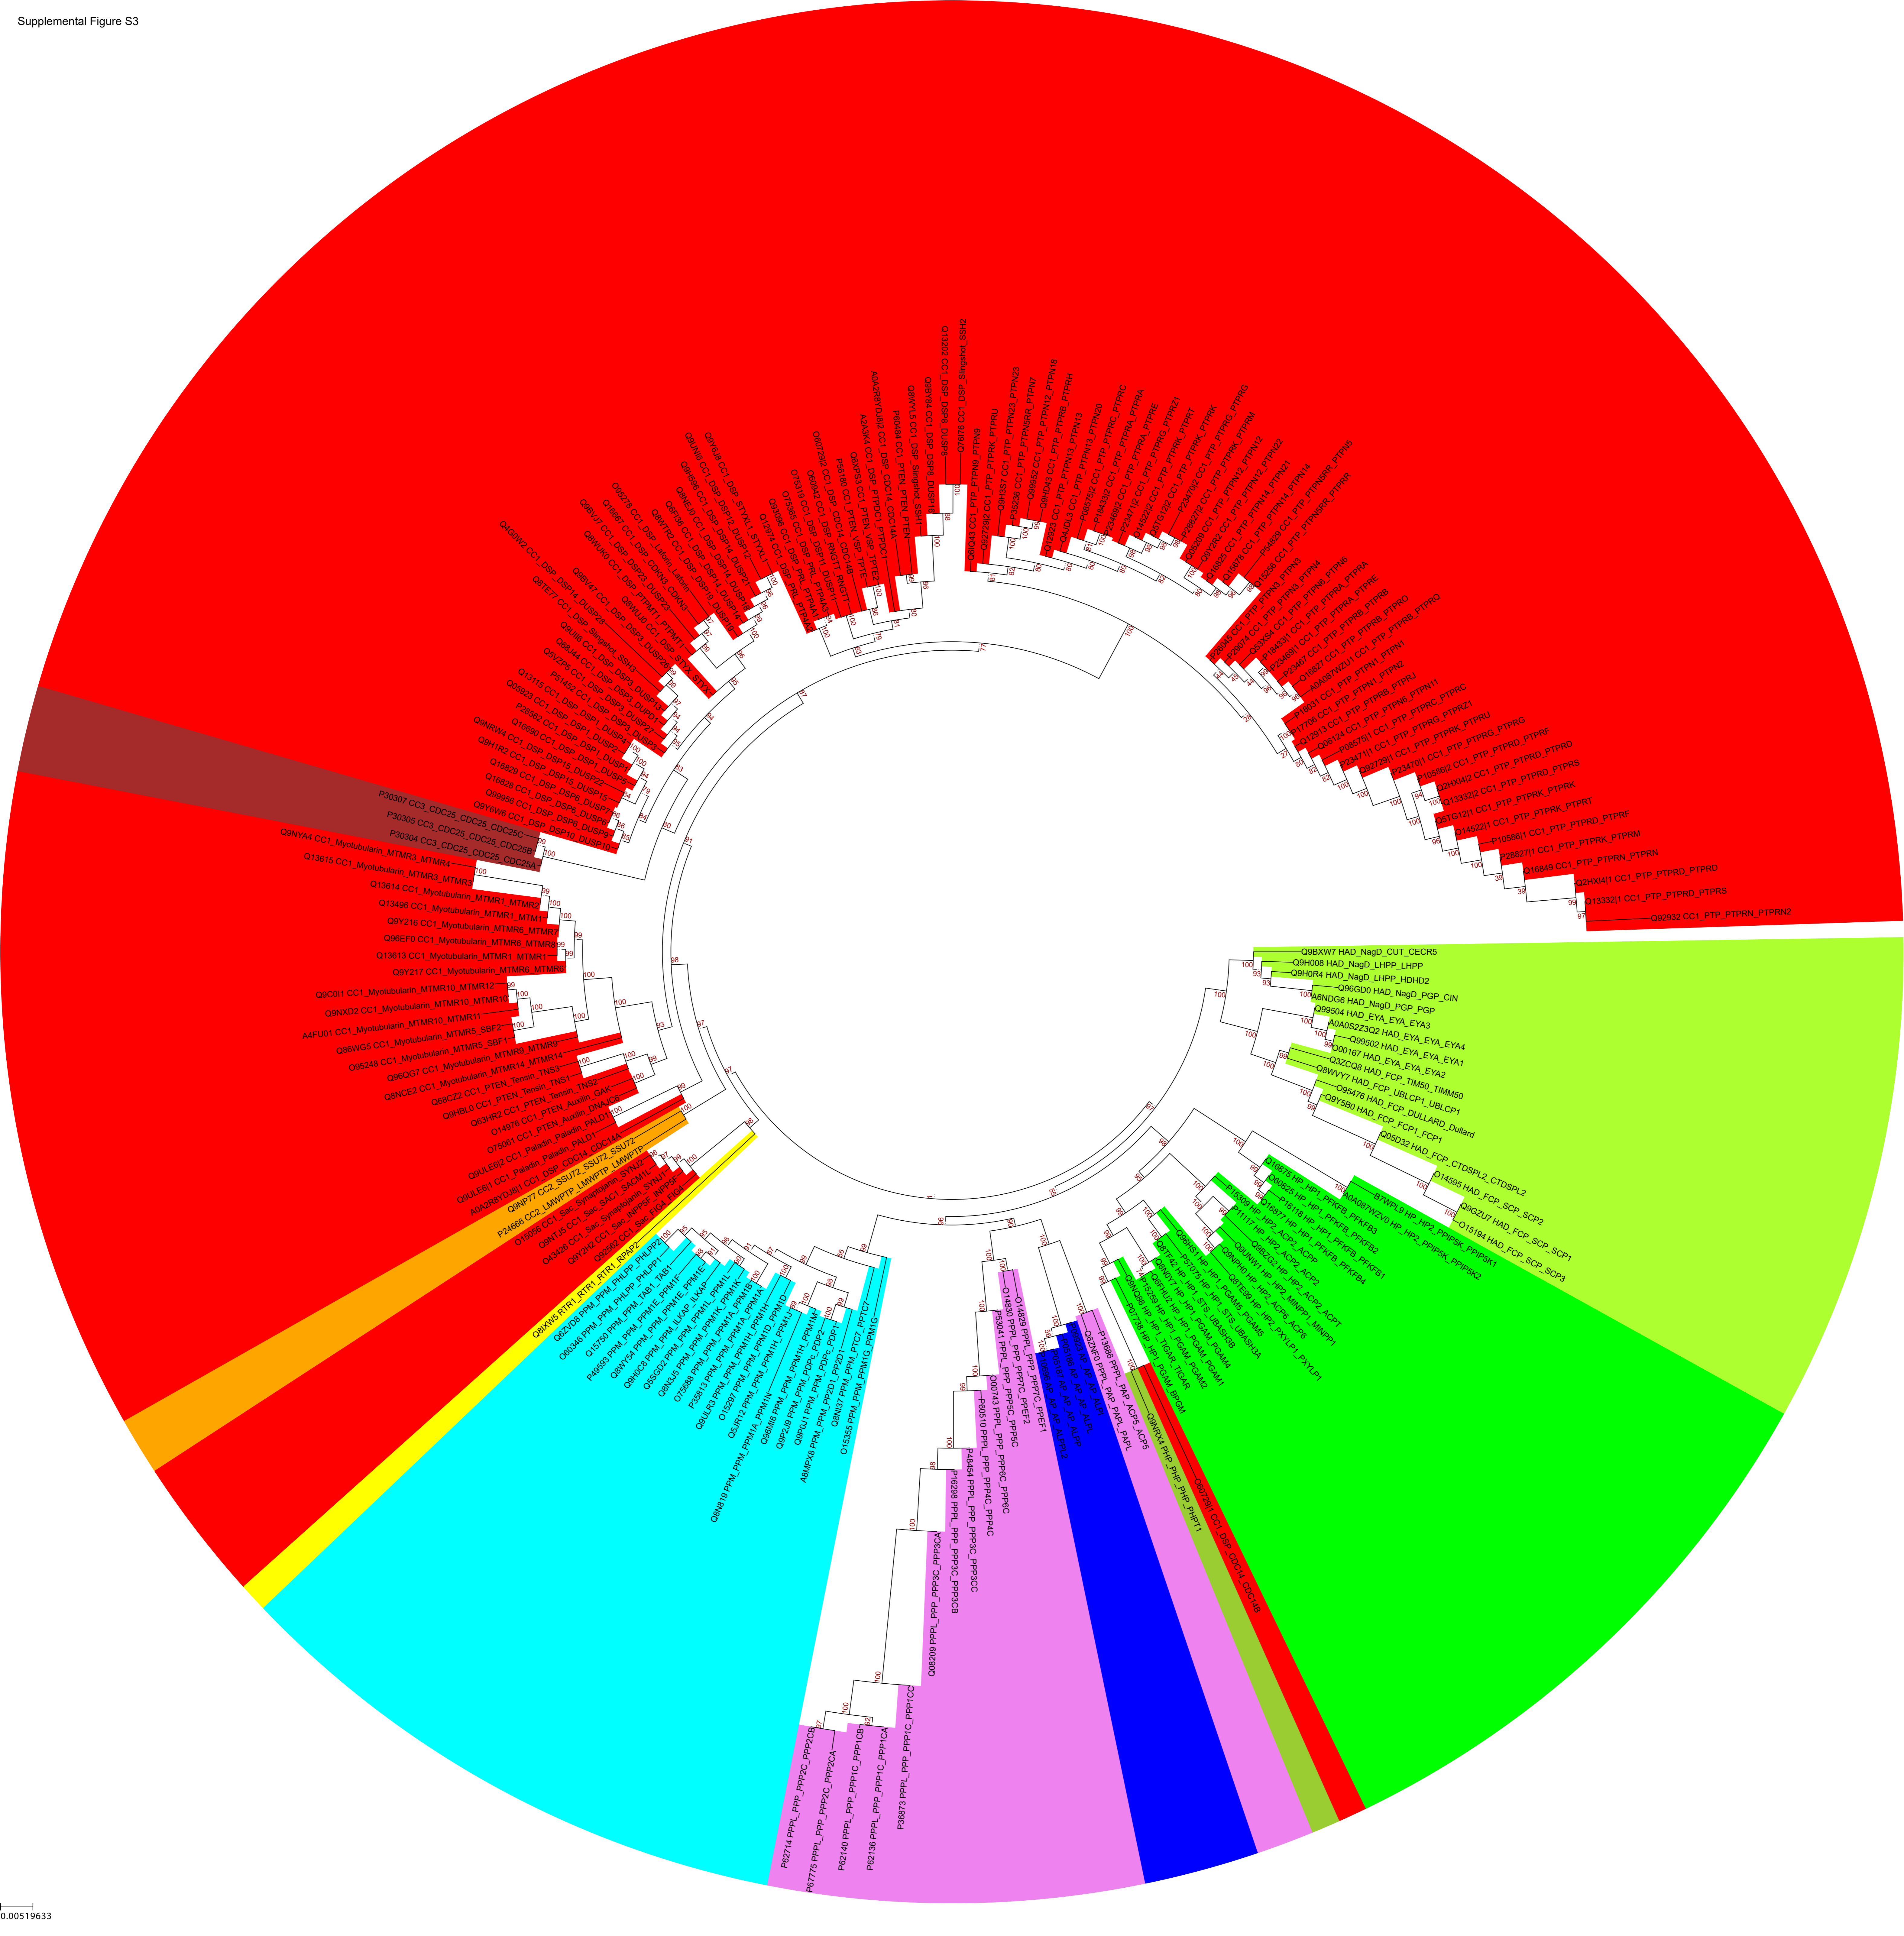

Supplement: supp_fig_s3_bbac619.pdf [file supp_fig_s3_bbac619.pdf]

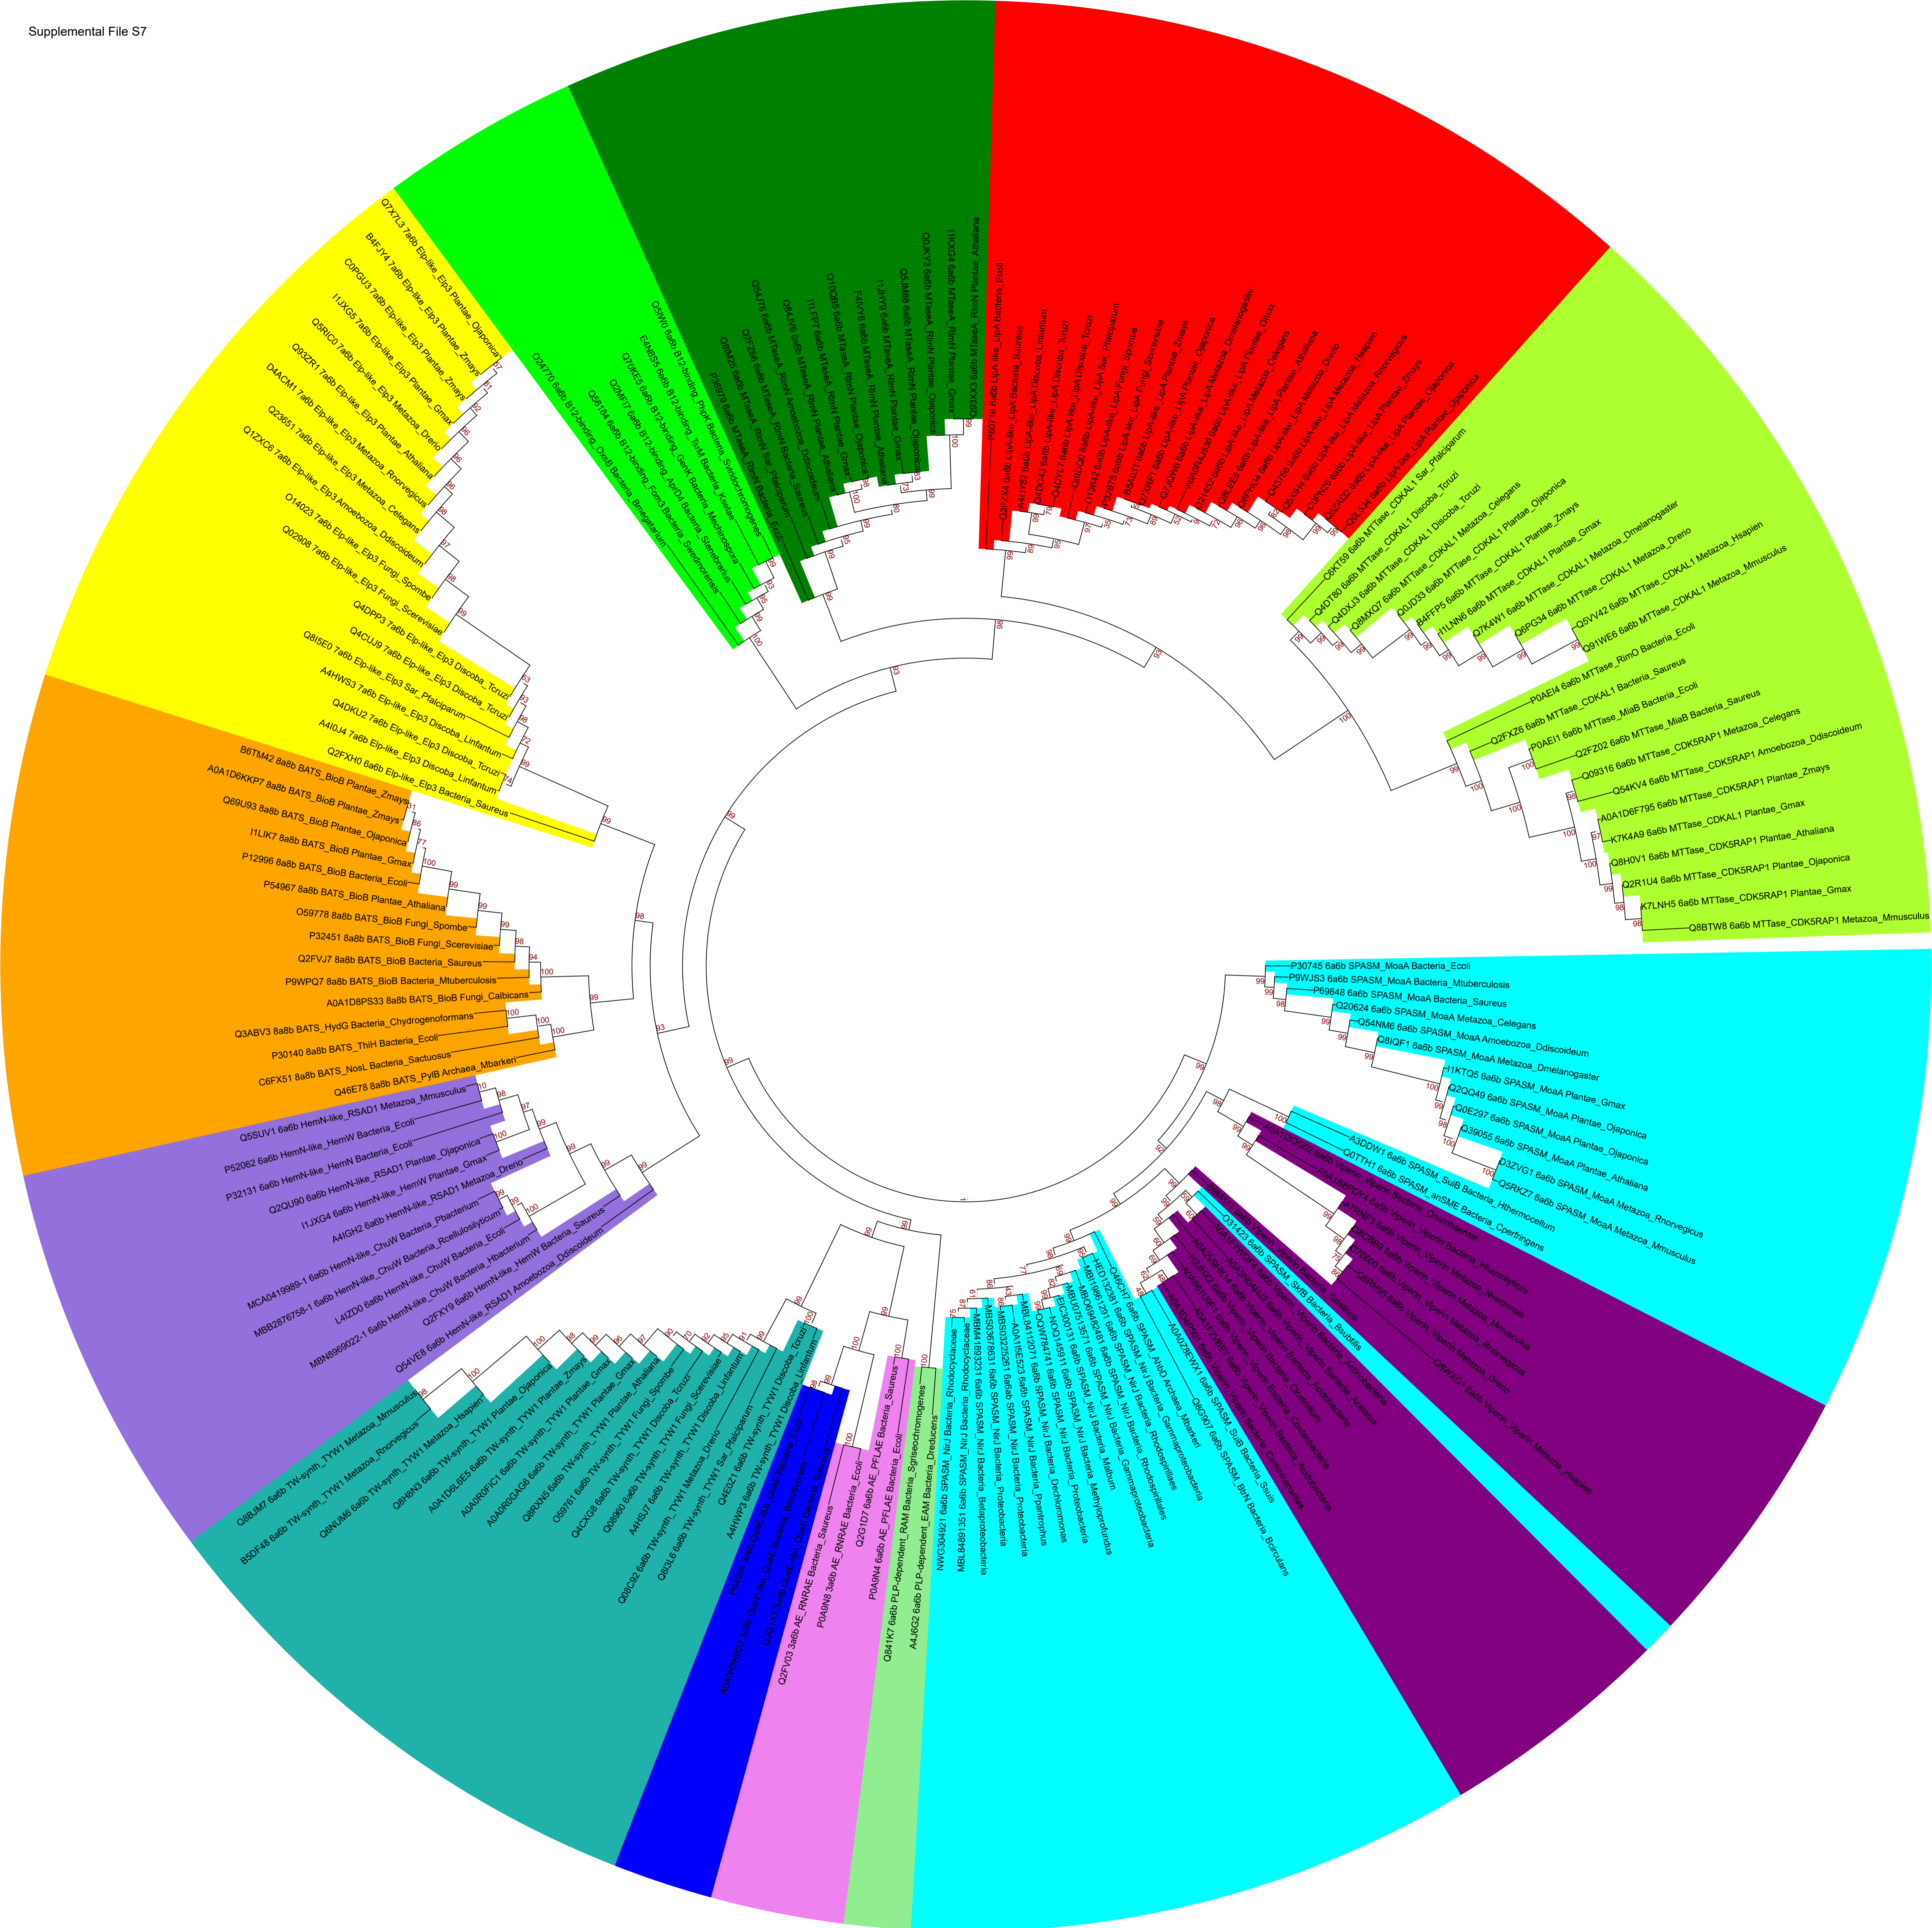

Supplement: supp_fig_s7_bbac619.pdf [file supp_fig_s7_bbac619.pdf]
